# Supplementary material for: Synthesis and oxygenation of selenophosphate dendrimers.
Source: Royal Society of Chemistry journal article supplement (doi:10.1039/b106849k), 2001-10-02
Supplement: b106849k.doc [file b106849k.doc]

**Supplementary data**

Experimental Procedures and Analyses

NMR spectra were measured on Bruker AC-200, MSL-300 and DRX-500 spectrometers. Matrix assisted laser desorption ionization time of flight mass spectroscopy (MALDI TOF MS) was performed on Voyager Elite mass spectrometer using dithranol or 2,5-dihydroxybenzoic acid as a matrix. FT-IR spectra were run on ATI Mattson 60 AR spectrophotometer.

**Tris(3-acetoxypropyl) selenophosphate** (**1A**). To a solution of propanediol monoacetate (1 mL, 9.1 mmol), triethylamine (1.52 mL, 10.1 mmol) in anhydrous CH2Cl2 (10 mL), PCl3 (0.264 mL, 3.0 mmol) was added at -10 C. The reaction mixture was stirred at rt for 1h, then black selenium (475 mg, 6.0 mmol) was added and resulting suspension was stirred at rt overnight. After the usual work up (ethyl acetate - water), combined organic layers were dried and concentrated. The residue was purified on short pad of silica (CCl4-Et2O 5:1) to give **1A** [1.16 g (83%)] as a colorless oil. 1H NMR (200 MHz, CDCl3) =1.59 - 1.65 (m, 6H, -CH2), 1.67 (s, 9H, CH3), 3.96 - 4.04 (m, 12H, ,-CH2) ppm. 13C NMR (50 MHz, CDCl3) = 21.2 (CH3), 30.0 (d, 3*J*(C,P)= 7.9 Hz, -CH2), 61.11 (-CH2), 66.24 (d, 2*J*(C,P) = 4.5 Hz, -CH2), 170.8 (C=O) ppm. 31P NMR (81 MHz, CDCl3) = 74.42 [1*J*(P, 77Se) = 958 Hz] ppm. MS FAB, m/z: 463.0, 461.1, 101.1.

**Tris(3-hydroxypropyl) selenophosphate** (**1**).The solution of compound **1A** (1.1 g, 2.4 mmol) in 5 mL of 30% methanolic ammonia was stirred at rt for 48 h. The reaction mixture was concentrated and the residue was passed through short column of silica gel (CH2Cl2 - acetone 2:1) to give 800 mg of **1** (100%). 1H NMR (200 MHz, CDCl3) = 2.30 (brs, 3H, OH), 2.91 (dq, 6H, 3*J*(H,H) = 5.88 Hz, 4*J*(H,P) = 0.82 Hz, -CH2), 3.76 (t, 6H, 3*J*(H,H) = 5.78 Hz, -CH2), 4.05 (dt, 6H, 3*J*(H,H) = 5.90 Hz, 2*J*(H,P) = 9.11 Hz, -CH2) ppm. 13C NMR (50 MHz, CDCl3) = 32.5 (d, 3*J*(C,P) = 7.9 Hz, -CH2), 58.0 (-CH2), 65.7 (d, 2J(C,P) = 5.2 Hz, -CH2) ppm. 31P NMR (81 MHz, CDCl3) = 71.62 [1*J*(P, 77Se) = 934 Hz] ppm. MS CI, m/z 337.1 (100%, M+1), 197.2 (82%).

**Bis(4-acetoxybutoxy)-*N,N*-diethylaminophosphine** (**2**). The solutions of butanediol monoacetate (5.0 g, 38 mmol) in anhydrous THF (10 mL) and triethylamine (5.3 mL, 38 mmol) in anhydrous THF were added slowly and simultaneously to a cooled (-25 C) solution of diethyl phosphoroamidous dichloride [commercially available; can be conveniently prepared from HNEt2 and PCl3 (bp 65-66 C 10 mmHg, 31P NMR =162 ppm)] (3.23 g, 0.19 mmol) in anhydrous THF (100 mL). Resulting reaction mixture was stirred at -20 C for 2h, then it was allowed to reach rt. Amine hydrochloride was filtered off under neutral atmosphere. The solution was concentrated, the residue was redissolved in petroleum ether (150 mL) and kept in the freezer overnight. The rest of precipitation was removed by filtration through dried celite under neutral atmosphere. Yield 7.1 g (99%, 96% purity). 1H NMR (200 MHz, CDCl3) =1.06 (t, 3*J*(H,H) = 7.1 Hz, 6H, C*H*3CH2), 1.7 (m, 8H, ,-CH2), 2.0 (s, 6H, C*H*3CO), 3.07 (dq, 3*J*(H,H)= 7.1 Hz, 3*J*(H,P)= 9.02 Hz, 4H, C*H*2N), 3.64 (dq, 3*J*(H,H)= 6.1 Hz, 3*J*(H,P)= 9.02 Hz, 4H, -CH2), 4.08 (t, 3*J*(H,H)= 6.1 Hz, 4H, -CH2) ppm. 13C NMR (50 MHz, CDCl3) = 15.67 (*C*H3CH2), 21.02 (*C*H3CO), 26.31 (d, 4*J*(C,P)= 7 Hz, -CH2), 28.66 (d, 2*J*(C,P) = 6.5 Hz, *C*H2N), 38.41 (d, 3*J*(C,P)= 20 Hz, -CH2), 63.45 (d, 2*J*(C,P) = 15 Hz, -CH2), 64.89 (-CH2), 171.9 (C=O) ppm. 31P NMR (81 MHz, CDCl3) = 147.8 ppm.

**General preparation of dendrimers: 3P4Se4, 3P10Se10, 3P22Se22, 3P46Se46**. Appropriate polyol **1**, **4P4Se4**, **4P10Se10** or **4P22Se22** (1 equiv.) was mixed with tetrazole (2 equiv. per one OH group) and anhydrous CH2Cl2 (1.5 mL per 100 mg of polyol). To this suspension amide **2** (3.4 equiv. per 1 equiv. of **1**), (7.8 equiv. per 1 equiv. of **4P4Se4**), (17 equiv. per 1 equiv. of **4P10Se10**), (36 equiv. per 1 equiv. of **4P22Se22**) was added. The reaction mixture was stirred at rt for 1h. Pyridine (20 fold excess over tetrazole) and black selenium (2 fold excess over **2**) were added and the reaction was left overnight at rt. The reaction mixture was diluted with ethyl acetate (15 mL per 1.5 mL of CH2Cl2) and an excess of selenium was filtered off. After the usual work up (water - ethyl acetate), the residue was purified on the short column of silica gel. Eluents: CCl4 - acetone 30:1, for **3P4Se4**, CCl4 - acetone 10:1 for **3P10Se10**, CH2Cl2 - acetone 20:1 for **3P22Se22**, CH2Cl2 - acetone 10:1 for **3P46Se46**. Yields: 94% of **3P4Se4**, 98% of **3P10Se10**, 70% of **3P22Se22**, 52% of **3P46Se46**.

**3P4Se4**: 1H NMR (200 MHz, CDCl3) = 1.71 [m, 24H, ,-CH21 (superscripts refer to the sphere number)], 2.02 (s, 18H, CH3), 2.03 (m, 6H, -CH20), 4.06 (m, 36H, ,-CH2) ppm. 13C NMR (50 MHz, CDCl3) = 20.89 (CH3), 24.78 (-CH2), 26.45 (d, 3*J*(C,P)= 8.5 Hz, -CH21), 30.36 (t, 3*J*(C,P)= 7.5 Hz, -CH20), 63.66 (-CH2), 64.67 (d, 2*J*(C,P) = 4 Hz, -CH20), 64.92 (d, 2*J*(C,P) = 4 Hz, ’-CH20), 68.25 (d, 2*J*(C,P) = 5 Hz, -CH21), 170.9 (C=O) ppm. 31P NMR (81 MHz, CDCl3) = 72.92 (3P1), 73.22 (1P0) [1*J*(P, 77Se) = 947 Hz] ppm. 77Se NMR (57 MHz, CDCl3, PhSeSePh = 436 ppm) =-366.4 (d, 1*J*(P, 77Se) = 951 Hz, 1Se0), -365.7 (d, 1*J*(P, 77Se) = 948 Hz, 3Se1) ppm. MALDI TOF MS, Calcd. for C45H84O24P4Se4: M+Na=1472. Found: m/z 1473.

**3P10Se10**: 1H NMR (200 MHz, CDCl3) = 1.75 (m, 72H, -CH21,2, -CH22), 2.05 (s, 36H, CH3), 2.07 (m, 6H, -CH20), 4.09 (m, 84H, ,-CH2) ppm. 13C NMR (50 MHz, CDCl3) = 20.84 (CH3), 24.79 (-CH22), 26.07 (d, 3*J*(C,P)= 8 Hz, -CH22), 26.47 (d, 3*J*(C,P)= 7.5 Hz, -CH21), 30.44 (m, -CH20), 63.66 (-CH2), 65.00 (-CH20), 68.14 (m, -CH21,2), 170.9 (C=O) ppm. 31P NMR (81 MHz, CDCl3) = 72.77 (6P2), 73.12 (3P1), 73.21 (1P0) [1*J*(P, 77Se) = 945 Hz] ppm. 77Se NMR (95 MHz, CDCl3, H2SeO3 = 1300 ppm) =-371.7 (d, 1*J*(P, 77Se) = 949 Hz, 6Se2), -371.3 (d, 1*J*(P, 77Se) = 950 Hz, 1Se0), -370.6 (d, 1*J*(P, 77Se) = 934.7 Hz, 3Se1) ppm. MALDI TOF MS, Calcd. for C105H198O54P10Se10: M+Na=3447. Found: m/z 3447.

**3P22Se22**: 1H NMR (500 MHz, CDCl3) = 1.75 (m, 168H, -CH21,2,3, -CH23), 2.04 (s, 72H, CH3), 2.09 (m, 6H, -CH20), 4.08 (m, 168H, -CH21,2,3, -CH23), 4.11 (m, 12H, -CH20) ppm. 13C NMR (126 MHz, CDCl3) = 20.88 (CH3), 24.78 (-CH23), 26.03 (d, 3*J*(C,P)= 7.5 Hz, -CH23), 26.45 (d, 3*J*(C,P)= 8.5 Hz, -CH21,2), 30.45 (m, -CH20), 63.64 (-CH2), 65.02 (m, -CH20), 68.09 (m, 2*J*(C,P) = 5 Hz, -CH21,2,3), 170.8 (C=O) ppm. 31P NMR (202 MHz, CDCl3) = 73.42 (12P3), 73.56 (6P2), 73.68 (3P1), 73.89 (1P0) [1*J*(P, 77Se) = 931 Hz] ppm. 77Se NMR (95 MHz, CDCl3, H2SeO3) =-365.6 (d, 1*J*(P, 77Se) = 945.2 Hz, 1Se0), -365.1 (d, 1*J*(P, 77Se) = 946.1 Hz, 12Se3), -364.5 (d, 1*J*(P, 77Se) = 949.0 Hz, 3Se1), -364.4 (d, 1*J*(P, 77Se) = 946 Hz, 6Se2) ppm. FT-IR (neat):  = 2959 (C-H), 2896 (C-H), 1738 (C=O), 1470 (C-H), 1336 (CH3), 1245 (CH3), 1012 (P-O), 987 (C-O), 853, 791 (P-O-C), 756 (P-O-C) cm-1. MALDI TOF MS: Calcd. for C225H426O114P22Se22: M+Na=7397. Found: m/z 7398.

**3P46Se46**: 1H NMR (200 MHz, CDCl3) = 1.76 (m, 360H, -CH21,2,3,4, -CH24), 2.05 (s, 144H, CH3), 2.08 (m, 6H, -CH20), 4.10 (m, 372H, -CH20,1,2,3,4, -CH24) ppm. 13C NMR (75 MHz, CDCl3) = 20.79 (CH3), 24.71 (-CH24), 26.16 (d, 3*J*(C,P)= 8.0 Hz, -CH24), 26.52 (d, 3*J*(C,P)= 8.1 Hz, -CH21,2,3), 63.67 (-CH2), 64.89 (m, -CH20), 68.14 (m, -CH21,2,3,4), 171.2 (C=O) ppm. 31P NMR (202 MHz, CDCl3) = 73.41 (24P4), 73.54 (12P3), 73.57 (6P2), 73.72 (3P1), 73.99 (1P0) [1*J*(P, 77Se) = 931 Hz] ppm. 77Se NMR (95 MHz, CDCl3, H2SeO3) =-365.4 (d, 1*J*(P, 77Se) = 941.4 Hz, 24Se4), -364.7 (d, 1*J*(P, 77Se) = 940.1 Hz, 12Se3), -364.5 (d, 1*J*(P, 77Se) = 938.0 Hz, 6Se2), -364.1 (d, 1*J*(P, 77Se) = 940 Hz, 3Se1) ppm. MALDI TOF MS, fragmentation: 1398, 1419, 1477, 1500, 1581, 1875, 2169, 2462, 2758, 3053, 3269, 3348, 3565, 3643, 3936, 4231, 4524, 4819, 5115, 5412, 5701, 5999, 6292.

**General Procedure for Deprotection of Dendrimers** **3P4Se4, 3P10Se10, 3P22Se22.**

To the suspension of K2CO3 (5%) in methanol (5 mL) containing 3% of water, dendrimer **3P4Se4** or **3P10Se10** or **3P22Se22** (100 mg) was added. The resulting mixture was stirred at rt for 4h. After that the pH of this mixture was set to ~7 (using 1% HCl in methanol) and the suspension was concentrated. The product was extracted from the residue with acetone (3 x 8 mL). Yield quantitative.

**4P4Se4**: 1H NMR (200 MHz, CD3OD) = 1.70 [m, 24H, ,-CH21 (superscripts refer to the sphere number)], 2.08 (qn, 3*J*(H,H) = 6.0 Hz, 6H, -CH20), 3.60 (t, 3*J*(H,H) = 6.4 Hz, -CH21), 4.14 (m, 24H, -CH2) ppm. 13C NMR (50 MHz, CD3OD) = 27.52 (d, 3*J*(C,P)= 7.0 Hz, -CH21), 29.58 (-CH21), 31.43 (t, 3*J*(C,P)= 7.0 Hz, -CH20), 62.23 (-CH2), 65.74 (d, 2*J*(C,P) = 4.5 Hz, -CH20), 66.07 (d, 2*J*(C,P) = 4.5 Hz, '-CH20), 69.68 (d, 2*J*(C,P) = 5.0 Hz, -CH21) ppm. 31P NMR (81 MHz, CD3OD) = 73.29 (3P1), 73.50 (1P0) [1*J*(P, 77Se) = 948 Hz] ppm. FT-IR (neat):  = 3373 (O-H), 2951 (C-H), 2896 (C-H), 1446 (C-H), 1014 (P-O), 984 (C-O), 796 (P-O-C), 739 (P-O-C) cm-1.

**4P10Se10**: 1H NMR (200 MHz, CD3OD) = 1.74 (m, 72H, -CH21,2 , -CH22), 2.12 (qn, 3*J*(H,H) = 6.0 Hz, 6H, -CH20), 3.60 (t, 3*J*(H,H) = 6.4 Hz, 24H, -CH22), 4.13 (m, 60H, -CH20,1,2) ppm. 13C NMR (50 MHz, CD3OD) = 27.62(dt, 2*J*(C,P)= 3.5 Hz, 3*J*(C,P)= 8.0 Hz, -CH21,2), 29.78 (-CH22), 31.64 (t, 3*J*(C,P)= 7.0 Hz, -CH20), 62.43 (-CH22), 66.14 (m, -CH20), 69.38 (d, 2*J*(C,P) = 5.0 Hz, -CH21), 69.56 (d, 2*J*(C,P) = 5.0 Hz, '-CH21), 69.78 (d, 2*J*(C,P) = 5.0 Hz, -CH22) ppm. 31P NMR (81 MHz, CD3OD) = 73.24 (6P2), 73.43 (3P1), 73.54 (1P0) [1*J*(P, 77Se) = 947 Hz] ppm.

**4P22Se22**: 1H NMR (200 MHz, CD3OD) = 1.71 (m, 168H, -CH21,2,3, -CH23), 2.14 (m, 6H, -CH20), 3.58 (m, 3*J*(H,H) = 6.4 Hz, 12H, -CH20), 3.61 (t, 3*J*(H,H) = 6.3 Hz, 48H, -CH23), 4.17 (m, 120H, -CH21,2,3) ppm. 13C NMR (50 MHz, CD3OD) = 27.61(dt, 2*J*(C,P)= 3.5 Hz, 3*J*(C,P)= 7.5 Hz, -CH21,2,3), 29.79 (-CH23), 31.72 (m, -CH20), 62.41 (-CH23), 66.37 (m, -CH20), 69.31 (d, 2*J*(C,P) = 5.0 Hz, -CH21,2), 69.38 (d, 2*J*(C,P) = 5.0 Hz, '-CH21,2), 69.79 (d, 2*J*(C,P) = 5.0 Hz, -CH23) ppm. 31P NMR (81 MHz, CD3OD) = 73.15 (12P3), 73.42 (6P2), 73.45 (3P1), 73.53 (1P0) [1*J*(P, 77Se) = 944 Hz] ppm. MALDI TOF MS: Calcd. for C177H378O90P22Se22: M+Na=6386. Found: m/z 6384.

**Oxygenation of Dendrimer** **3P22Se22**. To a solution of selenophosphate dendrimer **3P22Se22** (80 mg, 11 mol) in CH2Cl2 (1.5 mL), *tert*-butylperoxy trimethylsilane was added (14 mg, 85 mol). The resulting reaction mixture was stirred at room temperature. After 2h, the sample was analyzed by 31P NMR and MALDI TOF MS (see Figure 1). The degree of oxygenation was calculated from the integration of phosphorus signals. Next two amounts of peroxide were added after 16 h and 18 h respectively. 31P NMR (81 MHz, CDCl3) at 70% of oxygenation:  = [72.45, 72.90, 73.04, 73.07, 73.31, 73.34 (P=Se)] [1*J*(P, 77Se) = 944 Hz], [-0.39, -0.45 (P=O)] ppm. The 31P NMR (81 MHz, CDCl3) at 96% of oxygenation:  = [72.57, 72.74 (P=Se)] [1*J*(P, 77Se) = 941 Hz], [-0.49, -0.54 (P=O)] ppm. After 75 h of stirring at rt, the reaction mixture was diluted with acetone (8 mL). Red selenium was filtered off, the solution was concentrated and the residue was dried in vacuum. Yield of **3P22O** = 63 mg (98%).

**3P22O**: 1H NMR (200 MHz, CDCl3) = 1.74 (m, 168H, -CH21,2,3, -CH23), 2.02 (s, 72H, CH3), 2.16 (m, 6H, -CH20), 3.73 (m, 12H, -CH20), 4.04 (m, 168H, -CH21,2,3, -CH23), ppm. 13C NMR (50 MHz, CD3OD) = 20.93 (CH3), 26.00 (-CH23), 27.63 (d, 3*J*(C,P)= 7.5 Hz, -CH23), 27.81 (d, 3*J*(C,P)= 8.5 Hz, -CH21,2), 33.45 (m, -CH20), 65.04 (-CH2), 66.02 (m, -CH20), 68.89 (m, 2*J*(C,P) = 5 Hz, -CH21,2,3), 171.4 (C=O) ppm. 31P NMR (81 MHz, CDCl3) = - 0.42 ppm. FT-IR (neat):  = 3400 (OH), 2959 (C-H), 2923 (C-H), 1730 (C=O), 1472 (C-H), 1249 (CH3), 1027 (P=O), 904 (C-O), 676 (P-O-C), cm-1. MALDI TOF MS: Calcd. for C225H426O136P22: M+Na=6012. Found: m/z 6011.
